# Supplementary material for: Development of a Bioactive Sauce: Effect of the Packaging and Storage Conditions
Source: MDPI journal article supplement (doi:10.3390/chemengineering6030034), 2022-04-26
Supplement: s1 [file s1]

# Development of a Bioactive Sauce: Effect of the Packaging and Storage Conditions

Cecilia G. Giménez <sup>1</sup>, María Victoria Traffano-Schiffo <sup>2,\*</sup>, Sonia C. Sgroppo <sup>1,3</sup> and Carola A. Sosa <sup>1,\*</sup>

**Table S1.** Definition of sensory attributes. Anchors for all the attributes are in the brackets at the end of each definition.

| Sensory descriptors generated by the QDA panel |                                                                                   |                                                                                                                    |                                        |
|------------------------------------------------|-----------------------------------------------------------------------------------|--------------------------------------------------------------------------------------------------------------------|----------------------------------------|
| Descriptor                                     | Description                                                                       | Reference                                                                                                          | Extremes                               |
| Color                                          | Intensity of the orange color perceived when exposing the sample to light.        | 0: Freshly prepared squash/pepper sauce<br>5: Ketchup<br>10: Barbecue sauce                                        | Intense orange/<br>Dark brown          |
| Aroma                                          | Aroma perception when exposing the sample very close to the nose                  | 0: Freshly prepared pepper puree<br>10: Pepper puree with 3 years of storage                                       | Sweet aroma /rusty aroma               |
| Spreadability                                  | Ability to expand the product on solid food                                       | 0: Light jam<br>5: Freshly prepared squash/pepper sauce<br>10: Cream cheese                                        | Nothing spreadable/<br>very spreadable |
| Lumpiness                                      | Quantity of particles that are visualized on the expanded product on a solid food | 0: Cream cheese<br>5: Pumpkin/pepper sauce with 3 years of storage<br>10: Ricotta                                  | Nothing lumpiness/<br>very lumpiness   |
| Flavor                                         | Taste associated with mixtures of pumpkin and pepper puree                        | 0: Blend 50:50 freshly prepared squash/pepper puree<br>5: Citric acid solution 0.5%<br>10: Citric acid solution 1% | Typical/atypical (acid)                |
